# Supplementary material for: The first ratiometric fluorescent probes for aminopeptidase N cell imaging
Source: Royal Society of Chemistry journal article supplement (doi:10.1039/c2ob26564h), 2012-11-06
Supplement: c2ob26564h.pdf [file c2ob26564h.pdf]

## Supporting Information

### The first ratiometric fluorescent probes for aminopeptidase N cell imaging

Laizhong Chen, Wei Sun, Jing Li, Zhenzhen Liu, Zhao Ma, Wei Zhang, Lupei Du, Wenfang Xu, Hao

Fang and Minyong Li\*

*Department of Medicinal Chemistry, Key Laboratory of Chemical Biology of Natural Products (MOE), School of Pharmacy, Shandong University, Jinan, Shandong 250012, China*

\*Tel./fax: +86-531-8838-2076, E-mail: [mli@sdu.edu.cn](mailto:mli@sdu.edu.cn)

### Table of Contents

|                                                                   |    |
|-------------------------------------------------------------------|----|
| 1. Synthesis of <b>6c</b> and <b>6d</b> .....                     | S2 |
| 2. Time course scan of <b>6c</b> , <b>6d</b> to APN .....         | S4 |
| 3. Lineweaver-Burk plot for $V_{\max}$ and $K_m$ measurement..... | S4 |
| 4. Stability of <b>6c</b> , <b>6d</b> and <b>6e</b> .....         | S5 |
| 5. $^1\text{H}$ NMR, $^{13}\text{C}$ NMR and HR-MS spectra.....   | S6 |

## 1. Synthesis of 6c and 6d.

**Methyl 6-bromo-2-ethyl-1*H*-benzo[*de*]isoquinoline-1,3(2*H*)-dione (1a).** The solution of 4-bromo-1,8-naphthalic anhydride (13.8 g, 50 mmol) and ethanamine (3.91 g, 60 mmol) in 500 mL 1,4-dioxane was refluxed at 120°C for 4 h. Then the mixture was cooled and poured to 500 mL water. The yielded yellowish sediment were collected by filtration and dried under 110°C air atmosphere to yield a yellowish solid, 14 g, yield = 91.0%, mp: 159.2-160.1 °C.

**6-amino-2-ethyl-1*H*-benzo[*de*]isoquinoline-1,3(2*H*)-dione (2a).** The mixture of **1a** (1.5 g, 5 mmol), conc. ammonin (10 mL), copper power (0.032 g, 0.5 mmol) and a stirring bar were sealed in a 30 mL screwed tube and stirred in a oil bath at 100°C for 10 h. After cooling to r.t., the suspension was extraced with 50 mL AcOEt, to the residue was added 50 mL water and extraced by another 50 mL AcOEt. The combination was washed with brine (100 mL\*3) and dried over anhydrous MgSO<sub>4</sub> for 24 h. The solution was concentrated under reduced pressure and then purified by combiflash to yield a yellow power, 0.32 g, yield = 34.0%, mp: 280.0-282.3 °C.

**2-((((9*H*-fluoren-9-yl)methoxy)carbonyl)amino)propanoic acid (3c).** To the solution of Ala (3.5 g, 40 mmol) in 120 mL 10% Na<sub>2</sub>CO<sub>3</sub> was added the solution of FmocOSu (13.5 g, 40 mmol) in acetone (100 mL) at 0°C. The mixture was stirred at r.t. over night. Acetone was evaporated under reduced pressure and the residue was wased by ether (100 mL\*3). The water phase was adjusted pH to 2 with Conc. HCl and extracted with AcOEt (100 mL\*3). The organic phase was dried over anhydrous MgSO<sub>4</sub> for 24 h. The solution was concentrated under reduced pressure and then recrystallized with AcOEt-*n*-hexane to yield a white solid, 10 g, yield = 80.4%, mp: 138.2-139.7 °C.

**2-((((9*H*-fluoren-9-yl)methoxy)carbonyl)amino)pentanoic acid (3d).** The synthesis is analogous to **3c** with Nva as the starting material. The product was obtained as a white solid. Yield = 79.4%, mp:134.1-135.4 °C.

**(9*H*-fluoren-9-yl)methyl (1-chloro-1-oxopropan-2-yl)carbamate (4c).** To the solution of **3c** (0.5 g, 1.6 mmol) in CH<sub>2</sub>Cl<sub>2</sub> (8 mL) was added SOCl<sub>2</sub> (4 mL), the mixture was stirred at r.t. for 2 h. The solution was concentrated under reduced pressure and recrystallized with CH<sub>2</sub>Cl<sub>2</sub>-*n*-hexane to yield a white solid, 0.35 g, yield = 66.5%, mp: 94.5-96 °C.

**(9*H*-fluoren-9-yl)methyl (1-chloro-1-oxopentan-2-yl)carbamate (4d).** The synthesis is analogous to **4c** with **3d** as the starting material. The product was obtained as a white solid. Yield = 71.4%, mp: 95.3-97.1 °C.

**(9*H*-fluoren-9-yl)methyl**

**(1-((2-ethyl-1,3-dioxo-2,3-dihydro-1*H*-benzo[*de*]isoquinolin-6-yl)amino)-1-oxopropa**

**n-2-yl)carbamate (5c).** The suspension of **4c** (0.33 g, 1.0 mmol) and **2a** (0.12 g, 0.5 mmol) in AcOH (10 mL) was refluxed for 2 h. The mixture was cooled and poured into 50 mL water, the yield precipitation was filtered to yield a yellow power. The yellow power was purified by silica gel column to yield a pale-yellow power, 0.11 g, Yield = 41.3%, mp:112.7-113.4 °C.

**(9H-fluoren-9-yl)methyl**

**(1-((2-ethyl-1,3-dioxo-2,3-dihydro-1H-benzo[de]isoquinolin-6-yl)amino)-1-oxopentan-2-yl)carbamate (5d).** The synthesis is analogous to **5a** with **4d** and **2a** as the starting material. The product was obtained as a white solid. Yield = 73.5%, mp:95.3-97.1 °C.

**2-amino-N-(2-ethyl-1,3-dioxo-2,3-dihydro-1H-benzo[de]isoquinolin-6-yl)propanamide hydrochloride (6c).** The mixture of **5c** (0.06 g, 0.11 mmol) and 5 mL 20% piperidine-DMF was stirred at r.t. for 30 min then concentrated under reduced pressure at 90°C to remove excess piperidine and DMF. The residue was purified first by silica gel column and then recrystallization with AcOEt-*n*-hexane to yield a yellow solid. 5 mL EtOAc solution saturated with HCl gas was added and stirred at r.t. for 1 h. The yield precipitation was filtered and washed with AcOEt to yield a light yellow power, 20 mg, yield = 51.1%, mp: 255.3-257.8°C,  $[\alpha]_D^{20} = 31.51$  ( $c = 0.073$ , MeOH). <sup>1</sup>H-NMR (D<sub>2</sub>O, 300 MHz):  $\delta$  8.07 (d, 1 H,  $J = 7.2$  Hz), 7.99 (t, 2 H,  $J = 8.1$  Hz), 7.71 (d, 1 H,  $J = 8.1$  Hz), 7.51 (t, 1 H,  $J = 7.5$  Hz), 4.38 (q, 1 H,  $J = 6.9$  Hz), 3.81 (q, 2 H,  $J = 7.2$  Hz), 1.73 (d, 3H,  $J = 6.9$  Hz), 1.12 (t, 3 H,  $J = 7.2$  Hz); <sup>13</sup>C-NMR (DMSO, 150 MHz):  $\delta$  170.3, 163.7, 163.1, 139.5, 131.8, 131.5, 129.9, 128.7, 127.2, 125.2, 122.9, 121.1, 119.2, 49.5, 39.2, 17.8, 13.6; HRMS (ESI)  $m/z$  calcd. for C<sub>17</sub>H<sub>18</sub>N<sub>3</sub>O<sub>3</sub> ( $[M + H]^+$ ) 312.1343; found 312.1338.

**2-amino-N-(2-ethyl-1,3-dioxo-2,3-dihydro-1H-benzo[de]isoquinolin-6-yl)pentanamide hydrochloride (6d).** The synthesis is analogous to **6c** with **5d** as the starting material. The product was obtained as a light yellow power. Yield =49.5%, mp:277.4-280.0°C.  $[\alpha]_D^{20} = 40.00$  ( $c = 0.080$ , MeOH). <sup>1</sup>H-NMR (D<sub>2</sub>O, 300 MHz):  $\delta$  8.04 (d, 1 H,  $J = 7.5$  Hz), 7.97 (t, 2 H,  $J = 8.1$  Hz), 7.69 (d, 1 H,  $J = 8.1$  Hz), 7.49 (t, 1 H,  $J = 8.1$  Hz), 4.32 (t, 1 H,  $J = 6.6$  Hz), 3.79 (q, 2 H,  $J = 6.9$  Hz), 2.00-2.09 (m, 2 H), 1.49-1.59 (m, 2 H), 1.02-1.14 (m, 6 H); <sup>13</sup>C-NMR (DMSO, 150 MHz):  $\delta$  169.5, 163.6, 163.1, 139.2, 131.8, 131.5, 129.7, 128.7, 127.3, 125.2, 122.9, 121.3, 119.4, 54.4, 34.5, 32.3, 18.2, 14.1, 12.8; HRMS (ESI)  $m/z$  calcd. for C<sub>19</sub>H<sub>22</sub>N<sub>3</sub>O<sub>3</sub> ( $[M + H]^+$ ) 340.1656; found 340.1658.

## 2. Time course scan of 6c, 6d to APN

To the solution of **6c** or **6d** (80  $\mu\text{L}$ , 250  $\mu\text{M}$ ) in 0.1 M tris-HCl buffer at pH 7.5 was added the solution of APN (20  $\mu\text{L}$ , 10 IU/mL). The mixture was scanned for 30 min with excitation at 400 nm every two minutes by Varioskan microplate reader.

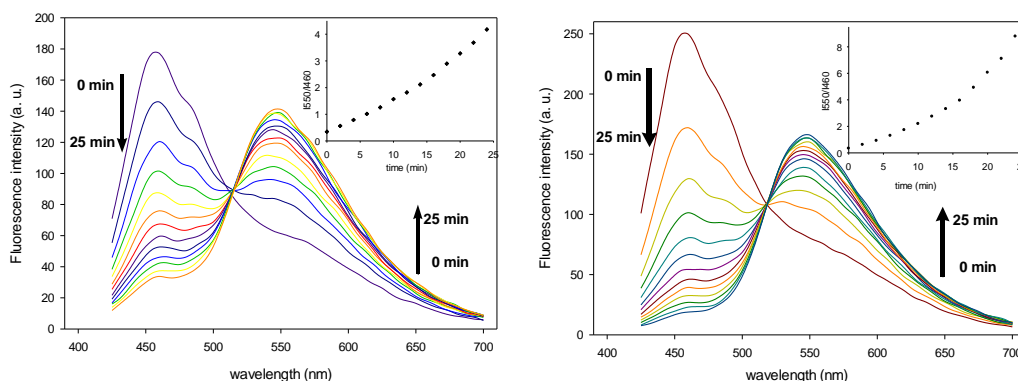

**Figure S1** Emission spectra of **6c** (left) and **6d** (right) (200  $\mu\text{M}$ ) in the presence of APN (0.2 IU) in a tris-HCl buffer (100 mM, pH 7.5). Insets: ratios of fluorescent intensities at 550 and 460 nm as a function of time after adding APN ( $\lambda_{\text{ex}} = 400 \text{ nm}$ ).

## 3. Lineweaver-Burk plot for $V_{\text{max}}$ and $K_{\text{m}}$ measurement

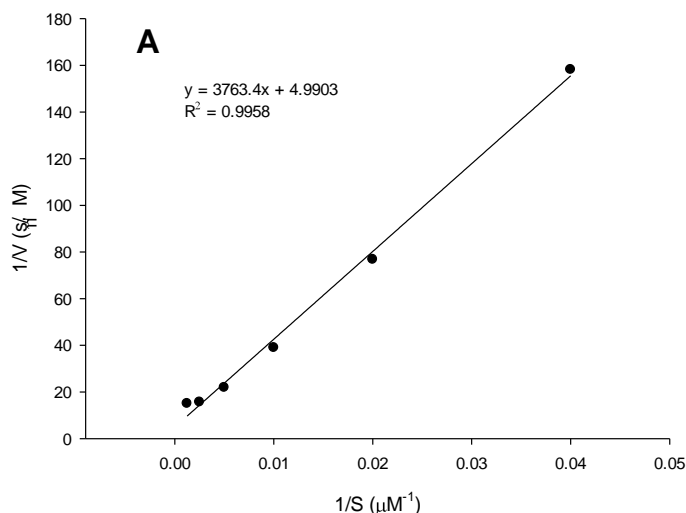

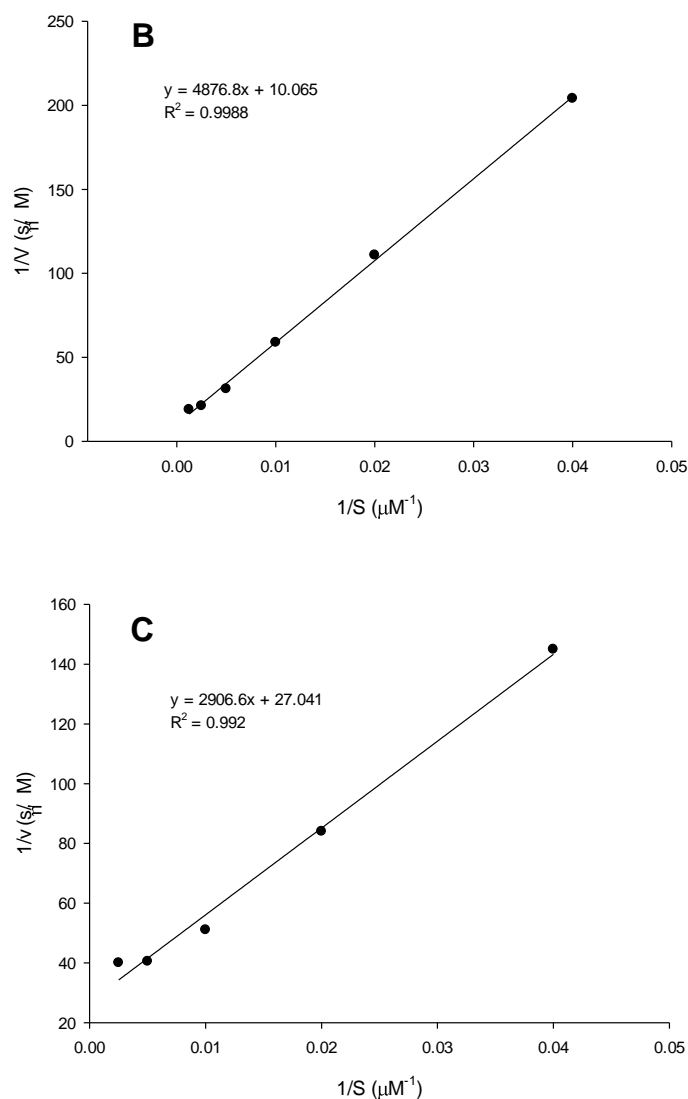

Figure S2 Lineweaver-Burk plot of **6c** (A), **6d** (B) and **6e** (C).

#### 4. Stability of **6c**, **6d** and **6e**

Stability of **6c**, **6d** and **6e** in tris-HCl buffer, artificial gastric juice and artificial intestinal juice was tested by measurement of the time course for the changing of ratios of fluorescent intensities at 550 and 460 nm (excitation at 400 nm) in a solution of 100  $\mu\text{M}$ .

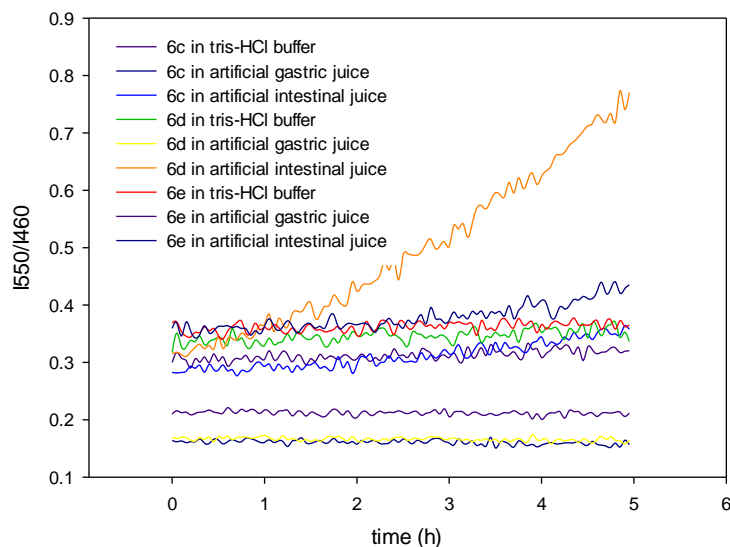

**Figure S3** Time course for the generation of ratios of fluorescent intensities at 550 and 460 nm (excitation at 400 nm) of **6c**, **6d** and **6e** in the solution of tris-HCl buffer (100 mM, pH=7.5), artificial gastric juice and artificial intestinal juice (100 $\mu$ M).

## 5. $^1\text{H}$ NMR, $^{13}\text{C}$ NMR and HR-MS spectra

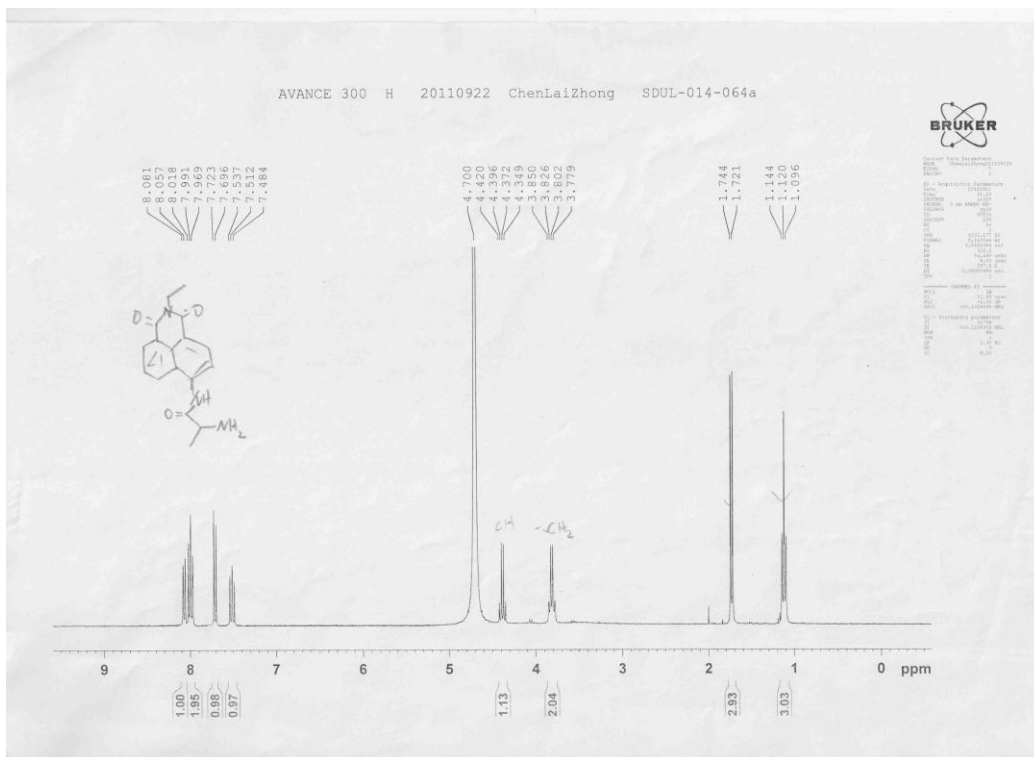

**Figure S4**  $^1\text{H}$  NMR (300 MHz) spectrum of Probe **6c**.

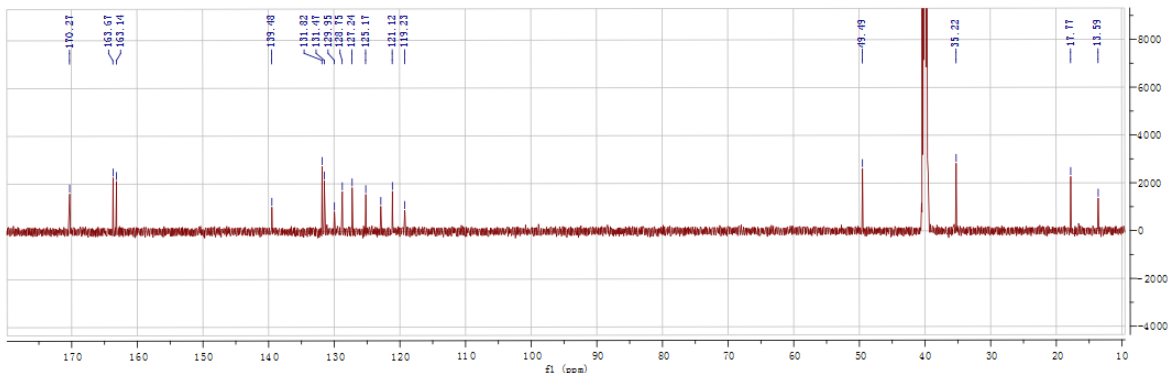

Figure S5 <sup>13</sup>C NMR (150 MHz) spectrum of Probe 6c.

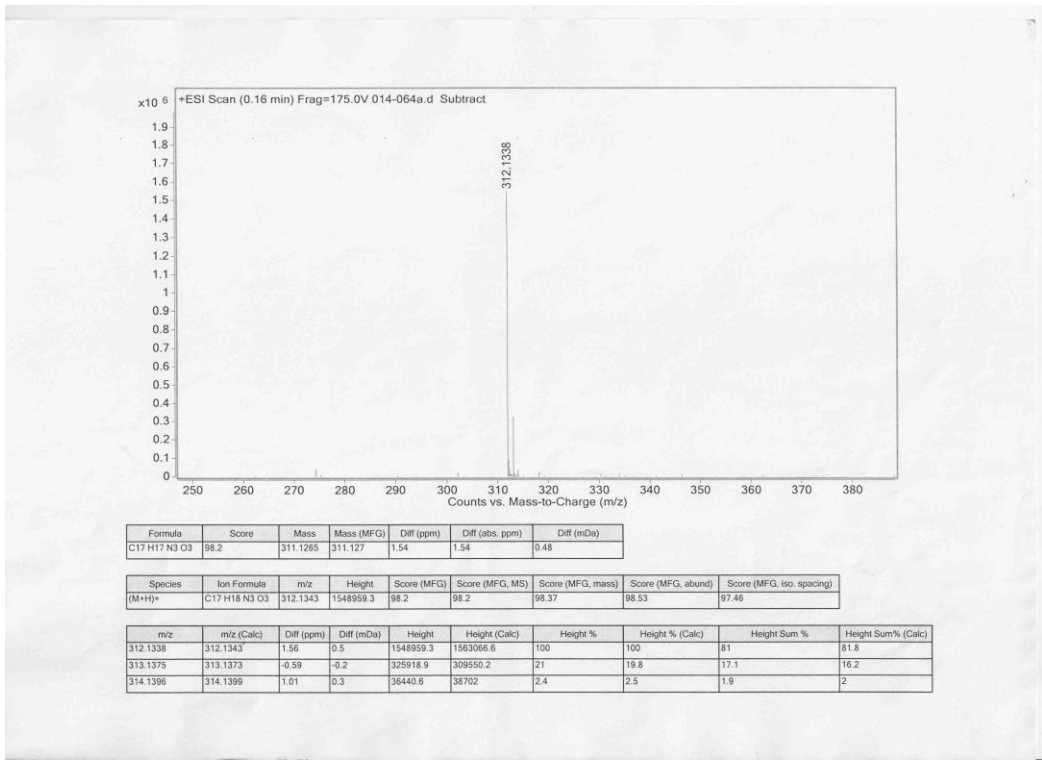

Figure S6 High resolution mass spectrum of Probe 6c.

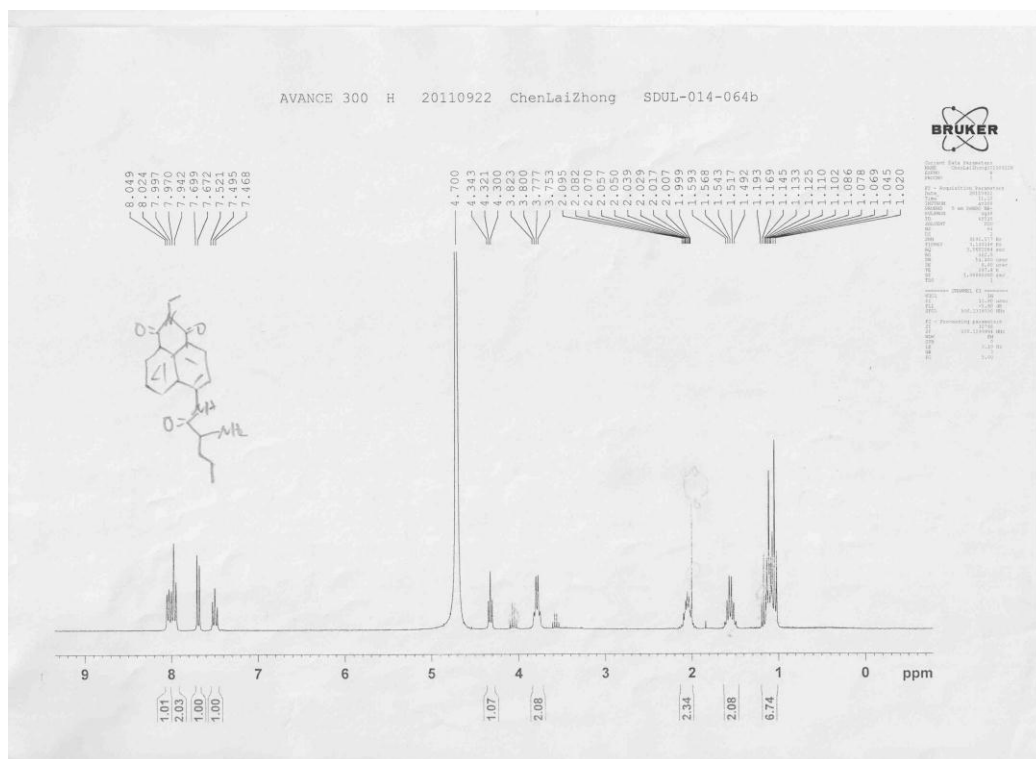

Figure S7 <sup>1</sup>H NMR (300 MHz) spectrum of Probe 6d.

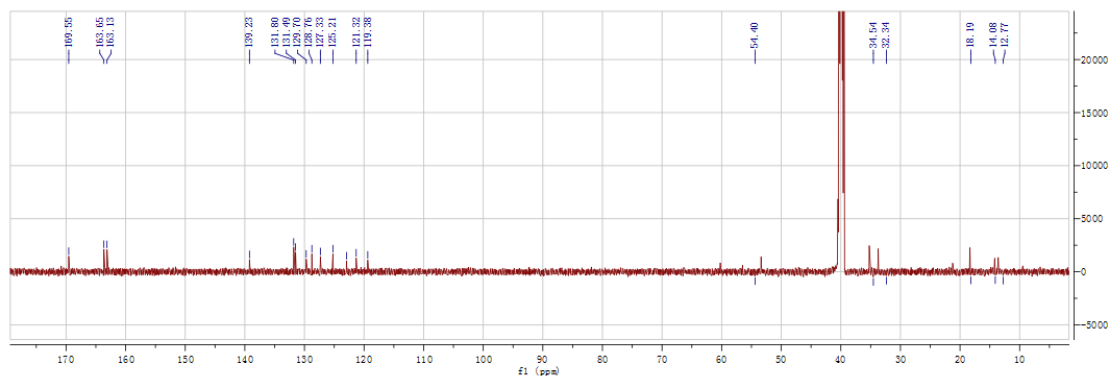

Figure S8 <sup>13</sup>C NMR (150 MHz) spectrum of Probe 6d.



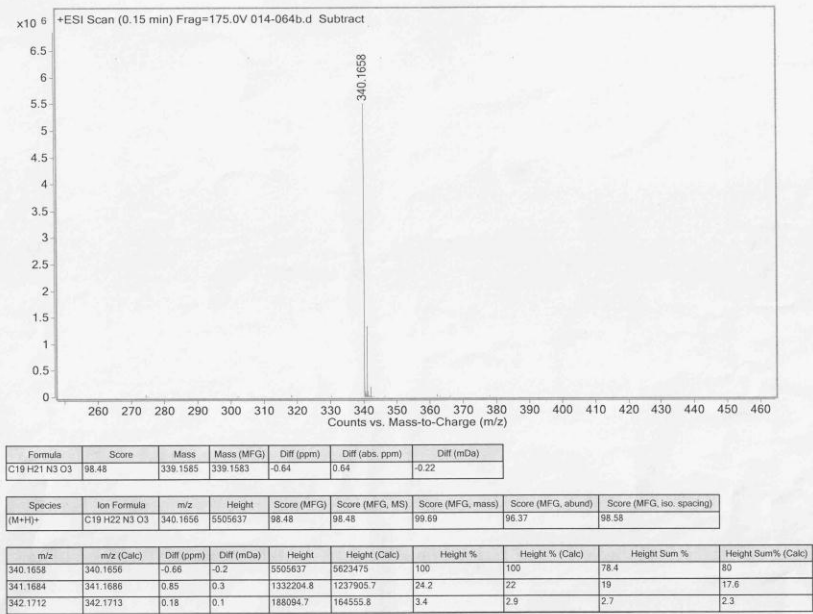

*Figure S9* High resolution mass spectrum of Probe **6d**.

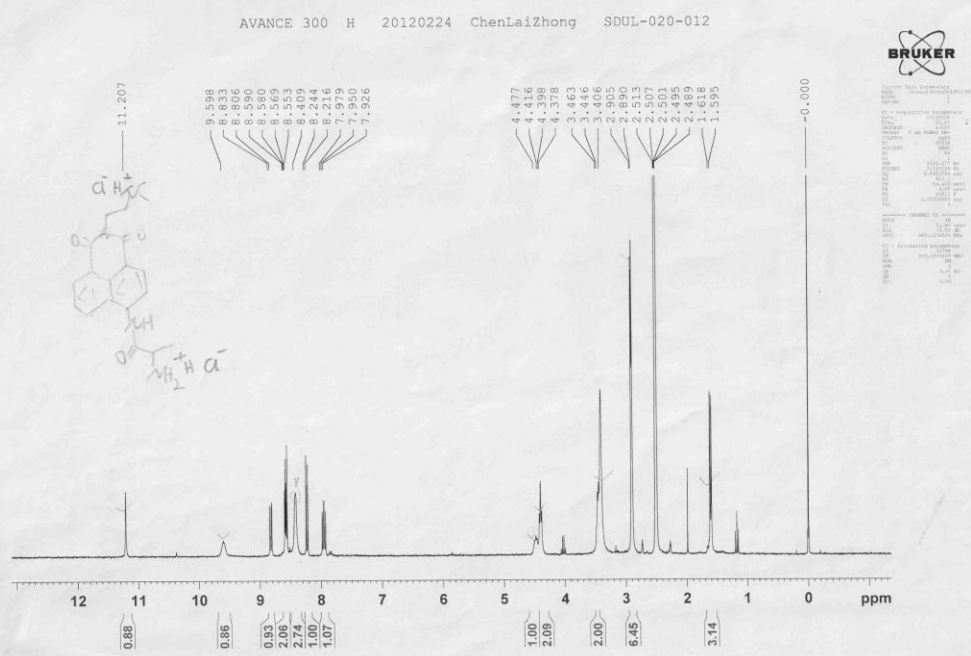

Figure S10  $^1\text{H}$  NMR (300 MHz) spectrum of Probe **6e**.

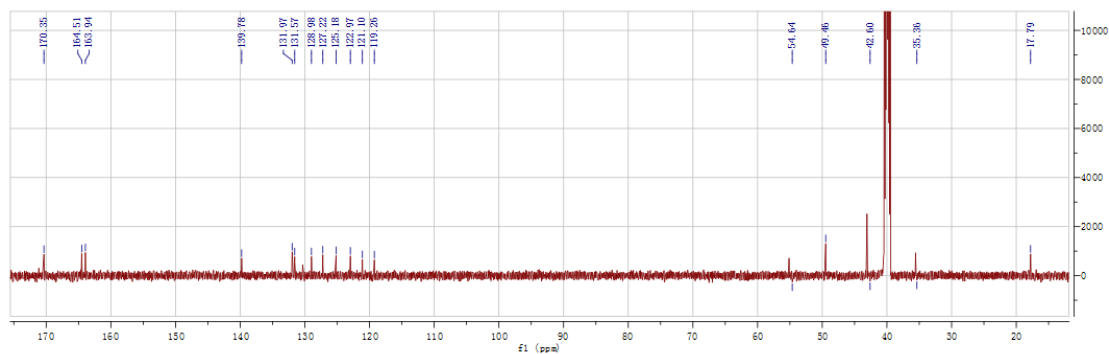

Figure S11 <sup>13</sup>C NMR (150 MHz) spectrum of Probe **6e**.

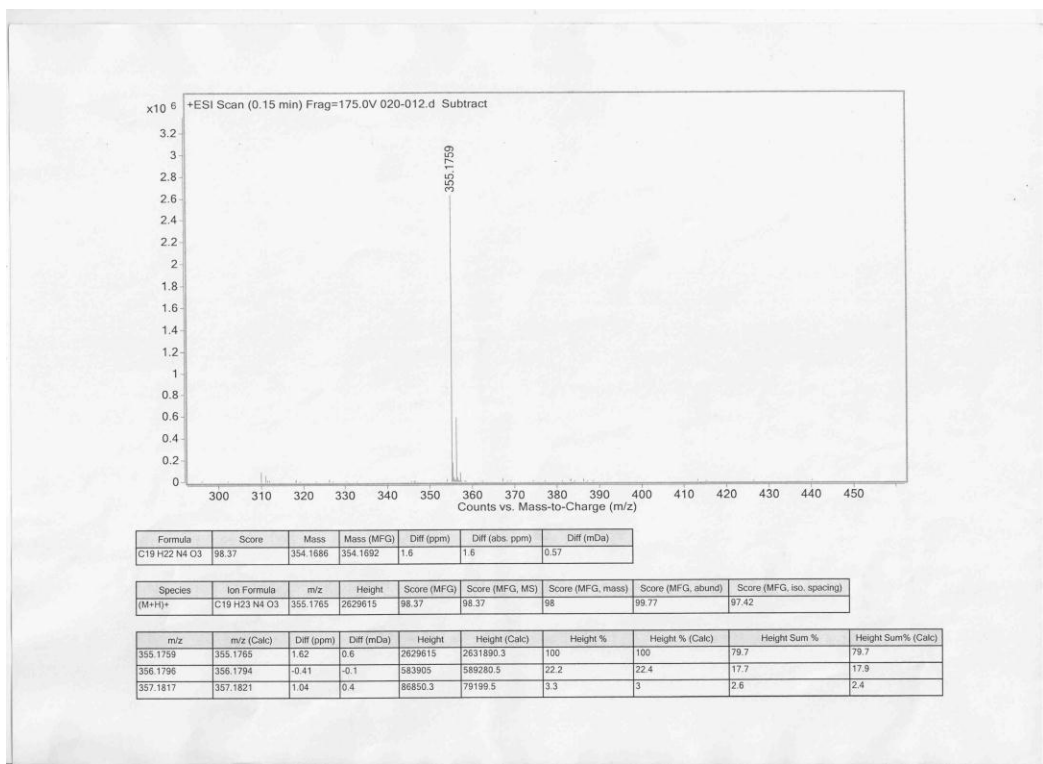

Figure S12 High resolution mass spectrum of Probe **6e**.
